# Supplementary material for: Surface Defects Improved SERS Activity of Nanoporous Gold Prepared by Electrochemical Dealloying
Source: MDPI journal article supplement (doi:10.3390/nano13010187), 2022-12-31
Supplement: s1 [file s1]

Archive with 1 entries (1 files):
- nanomaterials-2104236-supplementary.pdf
